# Supplementary material for: Efficient Stereo-Selective Fluorination on Vitamin D3 Side-Chain Using Electrophilic Fluorination
Source: MDPI journal article supplement (doi:10.3390/biom14010037), 2023-12-26

## Supplementary Materials

# Efficient Stereo-Selective Fluorination on Vitamin D<sub>3</sub> Side-Chain Using Electrophilic Fluorination

Fumihiro Kawagoe, Sayuri Mototani and Atsushi Kittaka \*

Faculty of Pharmaceutical Sciences, Teikyo University, 2-11-1 Kaga, Itabashi, Tokyo 173-8605, Japan;  
fkawagoe@pharm.teikyo-u.ac.jp (F.K.); 19dy10003vu@stu.teikyo-u.ac.jp (S.M.)

\* Correspondence: akittaka@pharm.teikyo-u.ac.jp; Tel.: +81-3-3964-8109; Fax: +81-3-3964-8117

### Contents

|                                                                                                                                     |       |
|-------------------------------------------------------------------------------------------------------------------------------------|-------|
| Title page                                                                                                                          | S1    |
| <sup>1</sup> H and <sup>13</sup> C NMR spectra of all new compounds <b>26</b> , <b>27</b> , <b>29</b> , <b>30</b> , and <b>33</b> . | S2-S6 |



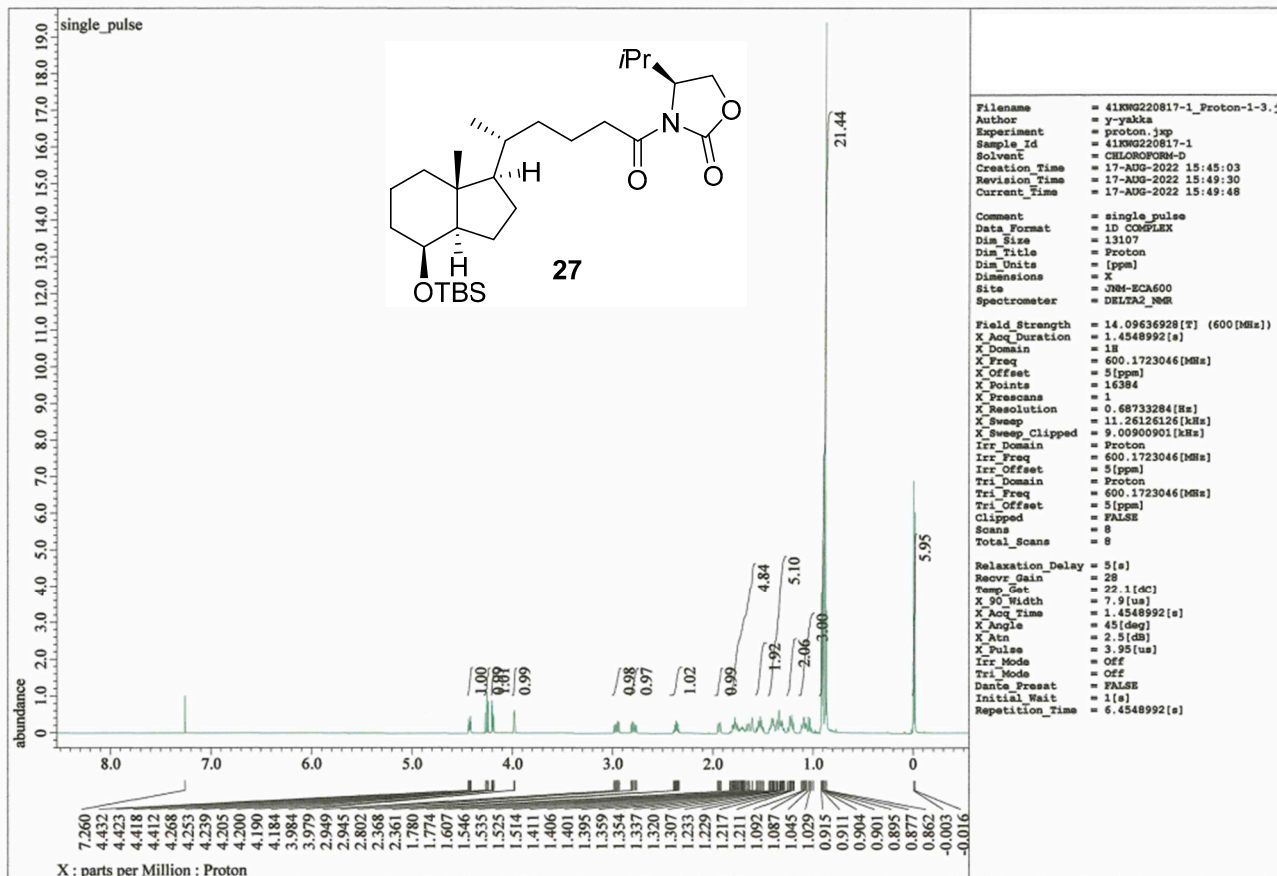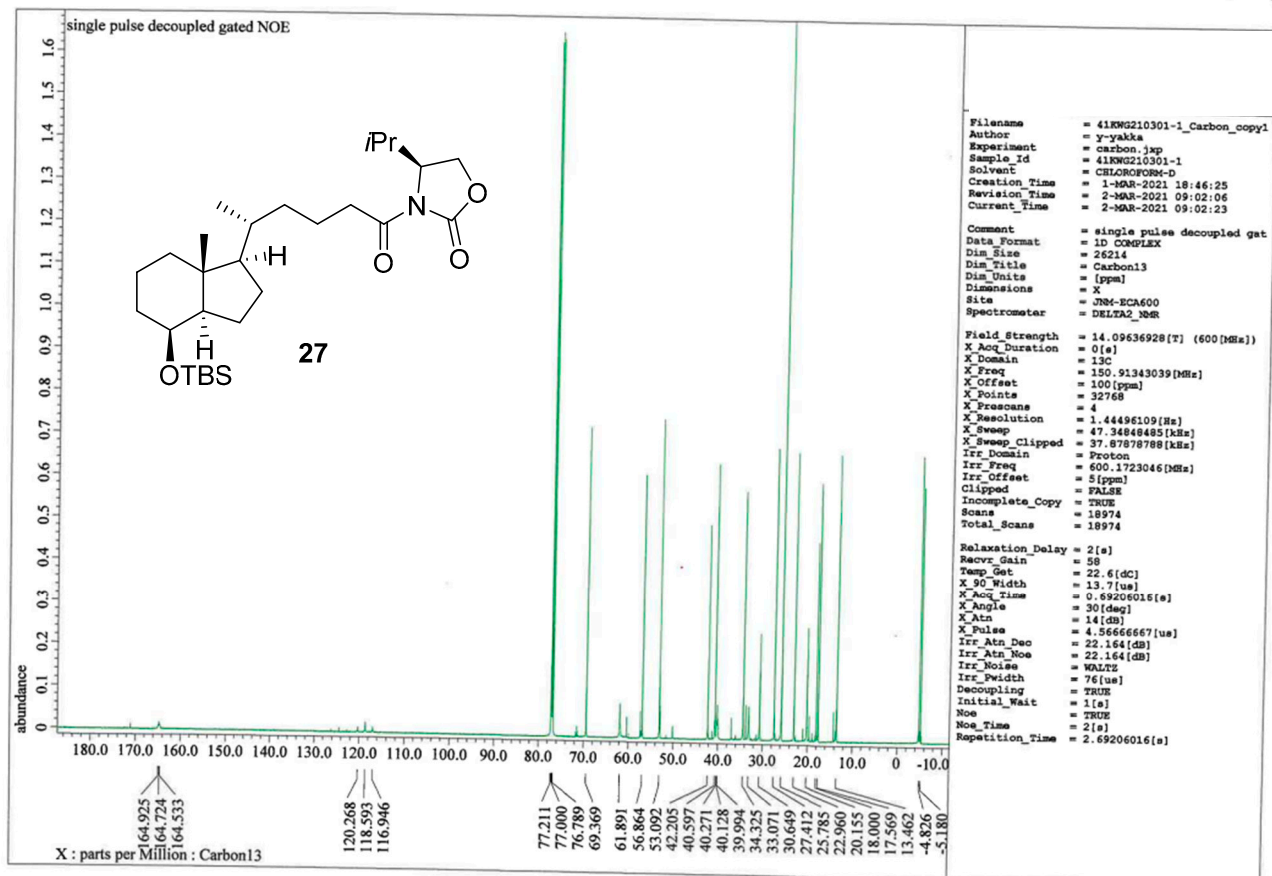

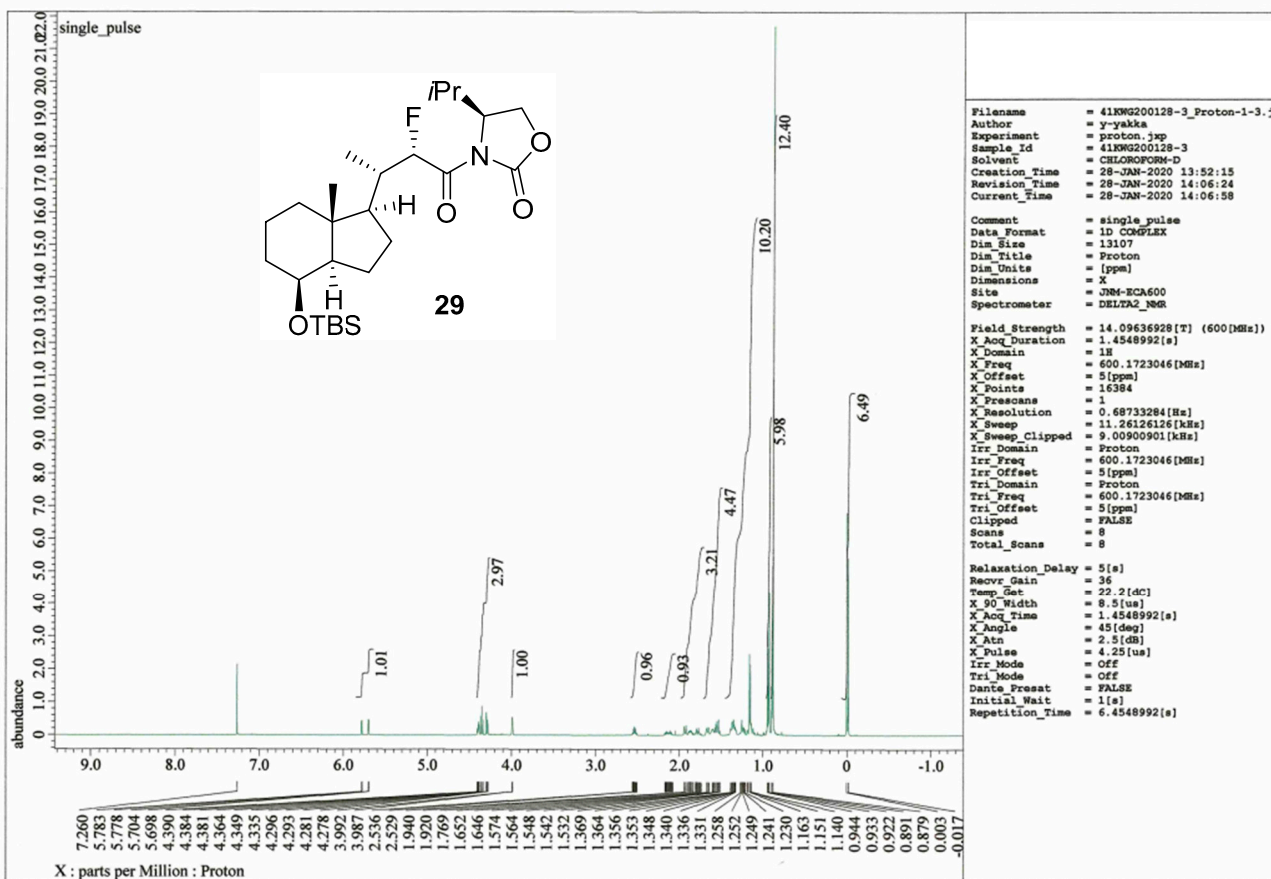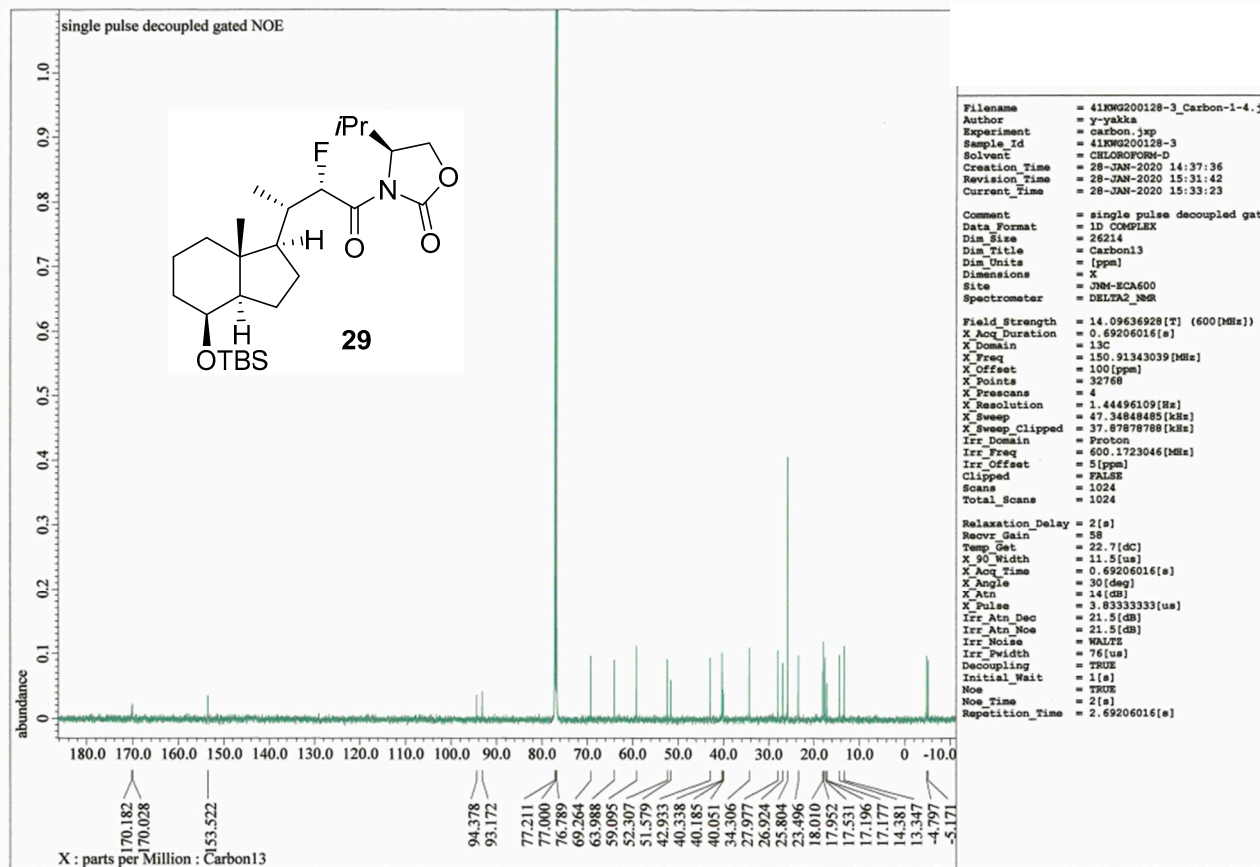



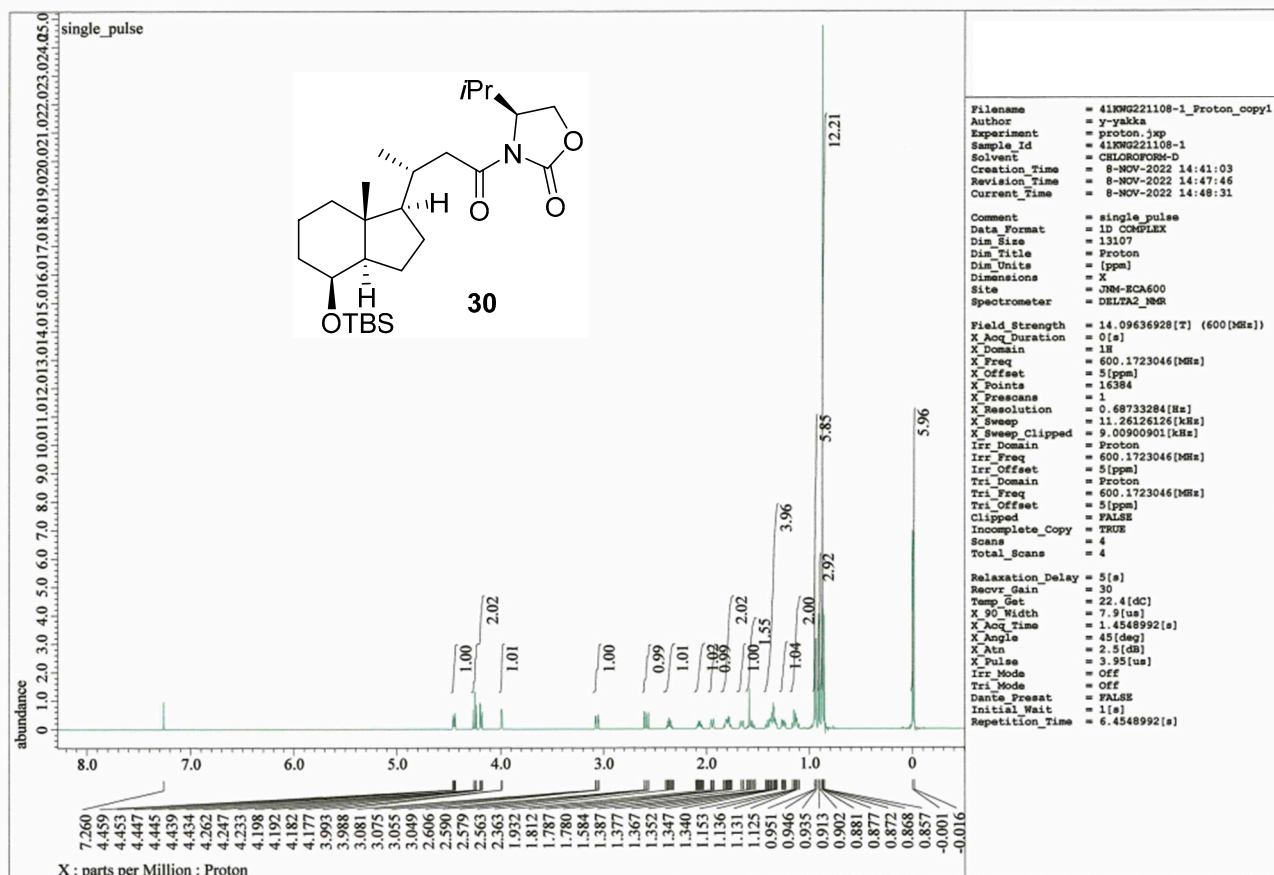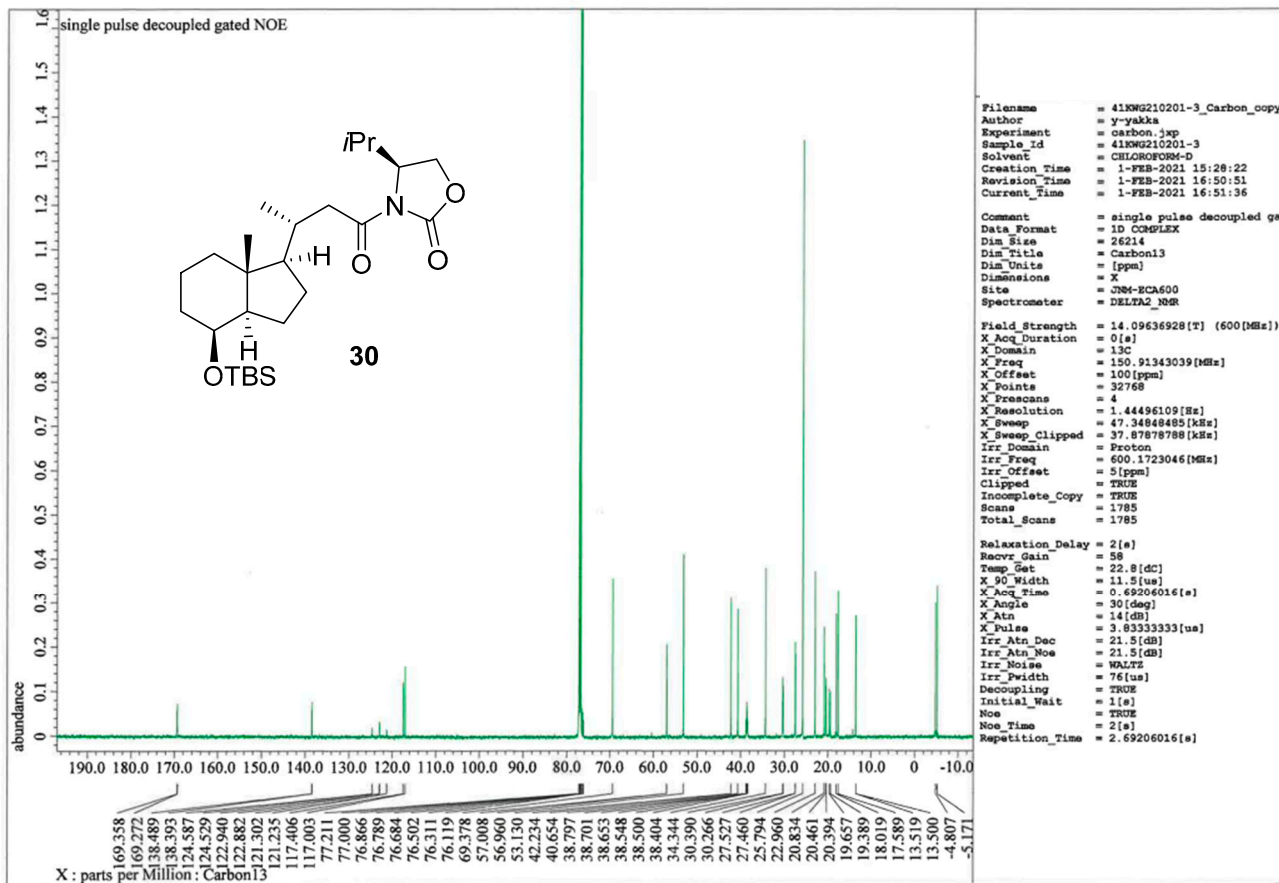

Supplement: s1 [file s1]
